# Supplementary material for: Trans-(±)-TTPG-B Attenuates Cell Cycle Progression and Inhibits Cell Proliferation on Cholangiocarcinoma Cells
Source: MDPI journal article supplement (doi:10.3390/molecules28217342), 2023-10-30
Supplement: s1 [file s1]

**Table S1.** Name and RCSB code of 22 selected targets of (±)-ARC and (±)-TTPG-B.

| No.                   | Protein  | PDB name | RMSD (Å) |
|-----------------------|----------|----------|----------|
| <b>Cell signaling</b> |          |          |          |
| 1.                    | ACDY10   | 4OYA     | 5.21*    |
| 2.                    | AKT      | 1GZN     | -        |
| 3.                    | CSF1R    | 4R7H     | 1.52     |
| 4.                    | EGFR     | 6DUK     | 2.03     |
| 5.                    | FLT3     | 5X02     | -        |
| 6.                    | GSK3b    | 4J71     | 3.71*    |
| 7.                    | HER2     | 3PP0     | 1.73     |
| 8.                    | Hsp90α   | 3O0I     | 3.57     |
| 9.                    | Hsp90β   | 3NMQ     | 2.81*    |
| 10.                   | JAK1     | 5HX8     | 2.05     |
| 11.                   | MDM2     | 3LBL     | 2.76     |
| 12.                   | MEK1     | 2P55     | 4.71*    |
| 13.                   | mTOR     | 4JSV     | -        |
| 14.                   | NF-kB    | 1SUC     | -        |
| 15.                   | PI3K     | 3CSF     | 3.87*    |
| 16.                   | PKC      | 3IW4     | 1.87     |
| 17.                   | RIPK     | 4ITJ     | 1.39     |
| 18.                   | STAT3    | 6MBZ     | -        |
| <b>Cell invasion</b>  |          |          |          |
| 1.                    | AKR1B1   | 4JIR     | 1.82     |
| 2.                    | VEGFR    | 4ASE     | 2.15     |
| <b>Cell cycle</b>     |          |          |          |
| 1.                    | CDK1     | 4Y72     | 3.82     |
| 2.                    | CyclinB1 | 4Y72     | -        |

The “\*” denoted the docked ligand and co-crystallized ligand are different. Therefore, the RMSD was computed based on the best fitting score.
